RESEARCH PAPER

# *Arabidopsis AtNAP* regulates fruit senescence

Xiaohong Kou<sup>1,2</sup>, Christopher B. Watkins<sup>1</sup> and Su-Sheng Gan<sup>1,\*</sup>

<sup>1</sup> Department of Horticulture, Cornell University, Ithaca, New York 14853–5904, USA

<sup>2</sup> School of Chemical Engineering and Technology, Tianjin University, Tianjin, 300072, China

\* To whom correspondence should be addressed. E-mail: [sg288@cornell.edu](mailto:sg288@cornell.edu)

Received 30 March 2012; Revised 20 August 2012; Accepted 31 August 2012

## Abstract

*Arabidopsis* has been used as a model system to study many aspects of plant growth and development. However, fruit senescence in *Arabidopsis* has been less investigated and the underlying molecular and hormonal (especially ethylene) regulatory mechanisms are not well understood. It is reported here that the *Arabidopsis* silique has characteristics of a climacteric fruit, and that *AtNAP*, a NAC family transcription factor gene whose expression is increased with the progression of silique senescence, plays an important role in its senescence. Silique senescence was delayed for 4–5 d in the *atnap* knockout mutant plants. The ethylene climacteric was delayed for 2 d in the *atnap* silique and the associated respiratory climacteric was suppressed. Exogenous ethylene stimulated respiration in the wild type, but not in the *atnap* mutant. The decoupling of the ethylene and respiratory climacterics in the *atnap* mutant suggests that *AtNAP* is required for ethylene stimulation of respiration. qPCR analyses revealed that the expression patterns of genes involved in ethylene biosynthesis, perception, and signalling, *ACS2*, *ETR1*, *CTR1*, *EIN2*, *EIN3*, and *ERF1*, were also altered in the *atnap* mutant. The effects of exogenous ABA, SA, 6-BA, and NAA on ethylene production and respiration in siliques of the wild type and *atnap* mutant were also investigated. A model involving ABA-*AtNAP*-controlled stomatal opening in regulating ethylene-stimulated respiration in fruit senescence is presented.

**Key words:** *Arabidopsis*, *AtNAP*, climacteric, ethylene, fruit senescence, gene regulation.

## Introduction

*Arabidopsis* and tomato are model systems for the study of development, ripening, and senescence of dry and fleshy fruits, respectively (Alexander and Grierson, 2002; Giovannoni, 2004, 2007; Klee and Giovannoni, 2011). In *Arabidopsis*, significant progress on the regulation of fruit development by transcription factors has been made; MADS box genes play key roles in carpel identity (reviewed in Giovannoni, 2007; Klee and Giovannoni, 2011). A MADS box gene in tomato named *LeMADS-RIN* has been shown to control fruit ripening non-hormonally (Vrebalov *et al.*, 2002). Although ectopic expression of *AGL15* (an *Arabidopsis* MADS domain-containing gene) under the direction of the senescence-specific *SAG12* promoter (Gan, 1995) delays flower senescence and silique maturation in *Arabidopsis* (Fang and Fernandez, 2002), this MADS domain gene is seed-specific and appears not to be expressed in carpels (silique walls). The

role of *AGL15* and other MADS genes in silique senescence in *Arabidopsis* remains elusive, and the transcriptional regulation of silique senescence is yet to be discovered. Guo and Gan (2006) found that *AtNAP*, a NAC family transcription factor gene, has an important role in leaf senescence in *Arabidopsis*. Leaf senescence was delayed for up to 10 d in the *atnap* knockout mutant plants whereas chemical induction of *AtNAP* in young leaves readily caused precocious leaf senescence. Recently, *AtNAP* is shown to be up-regulated early after anthesis, which corresponds with ovule senescence (Carbonell-Bejerano *et al.*, 2010). Whether *AtNAP* also has a role in regulating the senescence of siliques, a derivative of leaves, is not known.

Although *Arabidopsis* has been a useful model for many aspects of plant growth and development, including leaf senescence, research into the molecular and hormonal regulation

of its fruit senescence has been limited and has lagged behind that for tomato and other fruit. Recent studies on structural changes and senescence-associated gene expression during silique development and senescence revealed that it undergoes well-defined developmental and senescence processes in *Arabidopsis* (Wagstaff *et al.*, 2009; Carbonell-Bejerano *et al.*, 2010). Microarray analysis of gene expression profiles during silique senescence (Wagstaff *et al.*, 2009) represents a significant step toward a molecular understanding of fruit senescence in *Arabidopsis*. However, such fundamental questions as whether the *Arabidopsis* silique is a climacteric fruit and how the silique responds to exogenous ethylene and other hormones have not yet been addressed.

It is reported here that the *Arabidopsis* silique exhibits characteristics of a climacteric fruit that is subjected to regulation by ethylene and other hormones. It is also reported that *Arabidopsis* silique senescence is highly controlled by *AtNAP*. Silique senescence is delayed and the respiration surge associated with endogenous or exogenous ethylene is suppressed in the *atnap* knockout mutant plants. The ethylene production of the *atnap* siliques in response to treatments with abscisic acid (ABA), salicylic acid (SA), 6-benzylaminopurine (6-BA), and 1-naphthaleneacetic acid (NAA) is reduced compared with that of the wild type. qPCR analyses reveal that the expression of *AtACS2* (encoding a 1-amino-cyclopropane-1-carboxylic acid or ACC synthase), *AtETR1* (an ethylene receptor gene), *AtCTR1* (a gene for a negative regulator of ethylene signal transduction), *AtEIN2* (a gene for a positive regulator of ethylene signal transduction), and *AtERF1* (a target gene of *AtEIN3*) is down-regulated whereas the expression of *AtEIN3* (also a positive regulator of ethylene signal transduction) is up-regulated in siliques of the *atnap* plants.

## Materials and methods

### Plant materials and growth conditions

*Arabidopsis thaliana* ecotype Columbia and the *atnap* knockout mutant plants were used in this research. Seeds were sterilized with three rinses in 70% EtOH containing 0.01% Triton X-100, and a final rinse in 95% EtOH. The seeds were air-dried in a laminar flow hood and then sown on Petri dishes that were then placed at 4 °C overnight. Ten-day-old seedlings were transplanted to Fafard soils (3 parts moss:2 parts vermiculite:1 part perlite) and grown in growth chambers at 23 °C with 64% relative humidity under constant light (150  $\mu\text{mol m}^{-2} \text{s}^{-1}$  light from a mixture of fluorescent and incandescent bulbs (Guo and Gan, 2006).

### Treatments

To evaluate ethylene production and respiration rates, siliques of WT or the *atnap* knockout mutant plants were harvested at 4, 6, 8, 10, 12, and 14 d post-anthesis (DPA), respectively, and were placed into 10 ml vials; the vials were kept open for 30 min to vent any ethylene possibly caused by wounding before being sealed with serum caps. The vials were kept at 23 °C for 4 h (unless specified otherwise) for ethylene and CO<sub>2</sub> measurements. The 30 min delay between excision and sealing the vials was based on preliminary experiments in which WT siliques were placed into 10 ml vials immediately after excision or at different time periods up to 120 min. The ethylene production rates in WT siliques (4 DPA) were not affected by any time delay ( $P=0.353$ ), means  $\pm$  standard errors ( $n=4$ ) being  $30.5 \pm 0.9$ ,  $33.3 \pm 1.9$ ,  $29.9 \pm 2.0$ , and  $33.1 \pm 1.5 \text{ nl g}^{-1} \text{ h}^{-1}$  after 0, 30, 60, and 120 min, respectively. The 30 min period was therefore used for convenience to allow the randomization of siliques to vials where necessary.

To evaluate the effects of ethylene treatment on the endogenous production of ethylene and CO<sub>2</sub> production, siliques harvested at 4, 6, 8, 10, 12, and 14 DPA were placed in vials, which were injected with 5  $\mu\text{l}$  of 2% (v/v) ethylene (air as a control; Airgas, NY) to obtain a final concentration of  $10 \mu\text{l l}^{-1}$ . The siliques were kept at 23 °C for 2 h and then transferred into new vials and sealed. The vials with siliques were kept at 23 °C for 4 h for ethylene and CO<sub>2</sub> measurements. Four biological replications were performed for each sampling point.

For hormone treatments, siliques at 4 DPA were harvested and placed in 10 ml vials containing 200  $\mu\text{l}$  of 100  $\mu\text{M}$  ABA, 6-BA, SA, NAA or water, respectively. The samples were placed under a vacuum for 1 min. The vials were kept at 23 °C for 24 h for ethylene and CO<sub>2</sub> measurements. Four biological replications were performed for each treatment or sampling time point.

### Measurement of ethylene

Ethylene was analysed with a Hewlett Packard 5890 Series II gas chromatograph equipped with a Hewlett-Packard 3394A integrator. The column was 0.318 cm stainless steel packed with Alumina F-1, 60/80 mesh. Injector port, flame ionization detector, and column temperatures were 230, 245, and 200 °C, respectively. N<sub>2</sub>, H<sub>2</sub>, and air flow rates were 30, 30, and 230 ml min<sup>-1</sup>, respectively.

### Measurement of respiration

CO<sub>2</sub> was measured using a model 910 Buck Scientific gas chromatograph with a thermal conductivity detector (TCD). The oven temperature was 100 °C and the detector temperature was 250 °C. The carrier gas was helium, set to a flow of 10 ml min<sup>-1</sup>. The computer software used was PeakSimple version 3.85. The column was 0.91 m  $\times$  0.318 cm stainless steel packed with silica gel.

### Determination of chlorophyll content

Chlorophyll was extracted by placing silique walls into 1.5-ml microfuge tubes containing 80% acetone and shaking overnight in the dark. The chlorophyll *a/b* contents were measured using a Beckman spectrophotometer and were calculated as described previously (He and Gan, 2002).

### RNA extraction and RT-qPCR analyses of gene expression

Isolating DNA-free RNA from *Arabidopsis* siliques ready for the reverse transcriptase quantitative PCR (RT-qPCR) applications was performed according to Protocol 2 as described by Onate-Sanchez and Vicente-Carbajosa (2008). cDNA was synthesized using the iScript<sup>TM</sup> cDNA Synthesis Kit (Bio-Rad Product #170-8890). qPCR analyses of individual genes were performed with primers listed in Supplementary Table S1 at JXB online using the iQ<sup>TM</sup> SYBR Green Supermix (Bio-Rad Product #170-8880) according to the manufacturer's protocol. Briefly, for each qPCR reaction, 1  $\mu\text{l}$  of each diluted sample was used as a template in a 25  $\mu\text{l}$  reaction containing 12.5  $\mu\text{l}$  Bio-Rad<sup>®</sup> 2 $\times$  SYBR green supermix (Bio-Rad, Hercules, CA, USA), 8.5  $\mu\text{l}$  ddH<sub>2</sub>O, and 1  $\mu\text{l}$  of each primer. All qPCR reactions were performed on a Bio-Rad<sup>®</sup> IQ-5 thermocycler with 40 cycles and an annealing temperature of 55 °C. Cycle threshold (Ct) values were determined by the IQ-5 Bio-Rad software assuming 100% primer efficiency. Four cDNA samples derived from four samples at each time point were used. *Arabidopsis Actin2* (At3g18780) was used as an internal control. Data were expressed according to normalized expression (ddCT method). The expression levels of individual genes in the 4 DPA siliques of WT were set to 1.

### Statistical methods

Expression levels of genes were subjected to *t* test analyses, with  $P=0.05$  as the cutoff. All other data were subjected to ANOVA by using SPSS. The overall least significant difference (LSD) ( $P=0.05$ ) was calculated and used to separate means.

## Results

### Phenotypic changes in silique development and senescence in WT and *atnap* knockout plants

The *atnap* knockout mutant carries a T-DNA insert in the 2nd exon of *AtNAP* (At1g69490) that encodes a NAC family transcription factor (Guo and Gan, 2006). The *atnap* null mutant and WT plants are developmentally indistinguishable in terms of bolting and flowering times. However, silique senescence is dramatically delayed. As shown in Fig. 1B, the 1st siliques of the primary inflorescences of WT and the *atnap* plants were age-matched, but the WT silique became senescent and shattered while the mutant silique remained intact. Senescence had already progressed to the 4th silique of the WT while the 2nd silique of the *atnap* mutant remained green. Fig. 1C shows siliques with different ages (DPA). The senescence progression in the *atnap* siliques was markedly delayed compared with that in the WT.

### Chlorophyll changes during development and senescence in silique walls of WT and the *atnap* mutant plants

Chlorophyll *a*, chlorophyll *b*, and chlorophyll *a+b* concentrations in the silique walls of the WT and the *atnap* mutant were similar until 6 DPA (Fig. 2A–C). Chlorophyll concentrations then declined over time in WT siliques, while in the *atnap* remained high and then declined relatively slowly. The levels of chlorophyll *a*, *b*, and *a+b* were higher in the *atnap* silique walls than in WT silique walls after 6 DPA.

### Changes in ethylene production and respiration during silique development and senescence

The changes in the rates of ethylene production and respiration during fruit development and senescence in WT and *atnap* siliques were measured. Ethylene production increased in the WT siliques until 10 DPA and then decreased rapidly (Fig. 3A). Ethylene production by the *atnap* siliques also increased and then decreased, but these changes were delayed by about 2 d compared with that of WT. However, maximum ethylene production rates were similar between the two silique types.

The changes in respiration rate of the WT siliques (Fig. 3B) had a similar pattern to that of the ethylene production. By contrast, however, respiration rates of the *atnap* siliques increased to the maximum (approximately 70% of the maximum of that of WT) at 6 DPA, then remained steady until 12 DPA when the respiration rates started to decrease (Fig. 3B). These data suggest that *AtNAP* may be required for the typical respiration surge in response to endogenous ethylene.

### Effect of exogenous ethylene on respiration and endogenous ethylene production of siliques during development and senescence in WT and the *atnap* mutant plants

Exogenous ethylene will generally result in an earlier respiratory peak in climacteric fruits. Therefore, the respiration patterns of WT and mutant fruits treated with  $10 \mu\text{l l}^{-1}$  ethylene were investigated further. As shown in Fig. 4A, external application

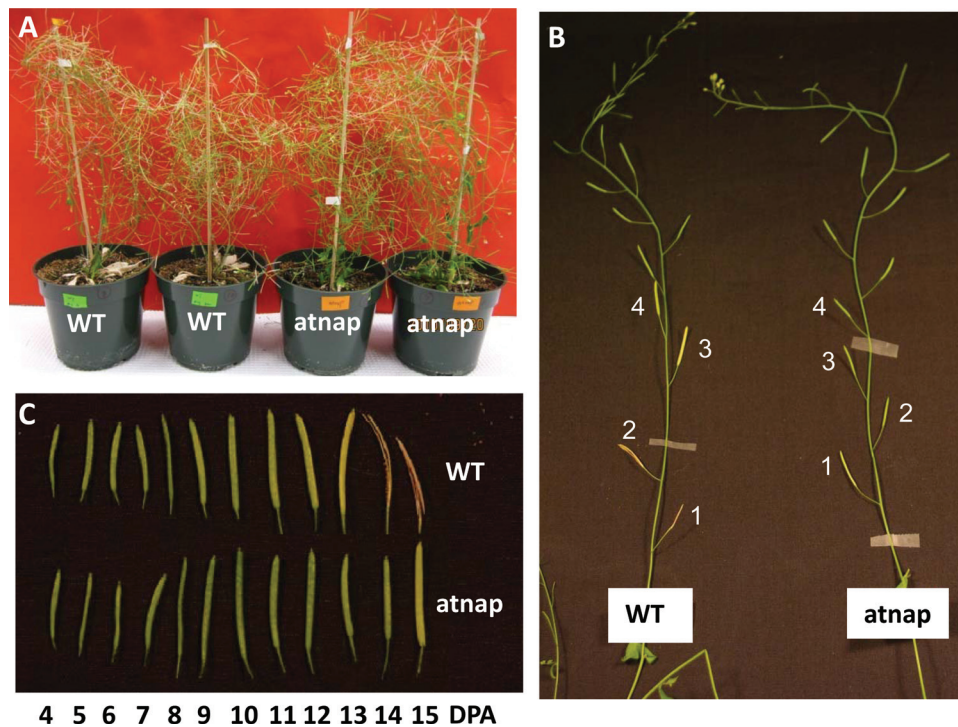

**Fig. 1.** Delayed silique senescence in the *atnap* knockout mutant. (A) Senescence of siliques of age-matched *atnap* mutant and wild-type (WT) plants. The plants were approximately 70 d after germination. (B) Senescence in siliques of main shoots of the *atnap* mutant and WT plants. The 1st, 2nd ... siliques are age-matched. Note the 1st WT silique became completely senescent and shattered. DPA, days post-anthesis. (C) Age-dependent progression of silique senescence in the *atnap* mutant and WT plants.



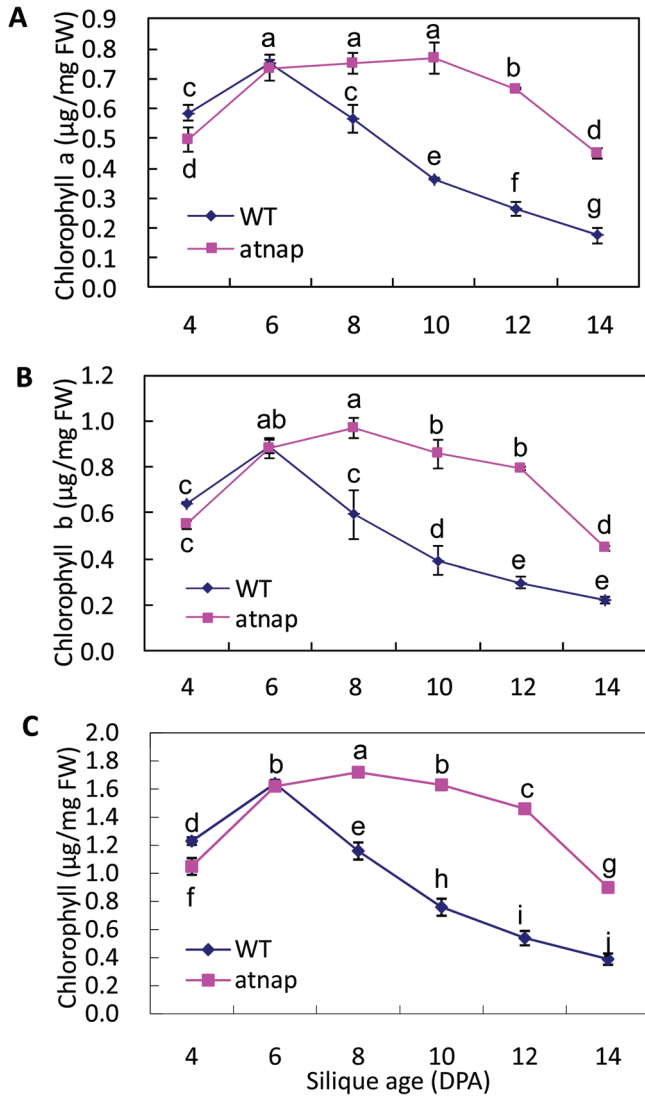

**Fig. 2.** Chlorophyll a (A), b (B), and a+b (C) in silique walls (excluding seeds) of the WT and *atnap* mutant. Bars are means  $\pm$ SD ( $n=4$ ). Significant ( $P=0.05$ ) differences between means are indicated by different letters.

of ethylene stimulated the respiratory intensity in WT fruits and the climacteric peak was observed at 8 DPA, approximately 2 d earlier than that of the control. By contrast, the same ethylene concentration appeared to have little effect on the respiration of ethylene-treated and untreated siliques of the *atnap* mutant (Fig. 4B). These data again suggest that *AtNAP* may be required for the respiration surge in response to both endogenous and exogenous ethylene.

Endogenous ethylene production in siliques after exogenous ethylene treatment was also measured. Exogenous ethylene also stimulated endogenous ethylene production in the WT siliques (Fig. 5A) but had little effect in the *atnap* mutant siliques (Fig. 5B).

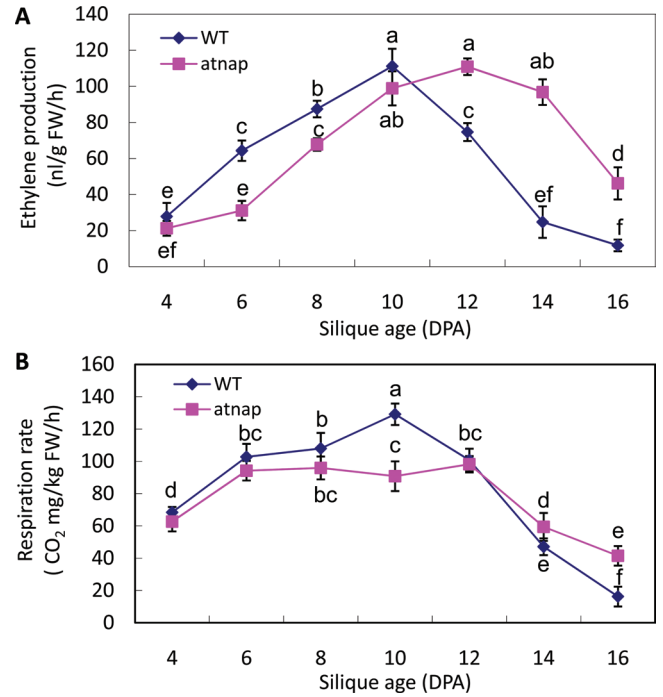

**Fig. 3.** Ethylene production (A) and respiration rate (B) of the WT and *atnap* mutant during silique development and senescence. Bars are means  $\pm$ SD ( $n=4$ ). Significant ( $P=0.05$ ) differences between means are indicated by different letters.

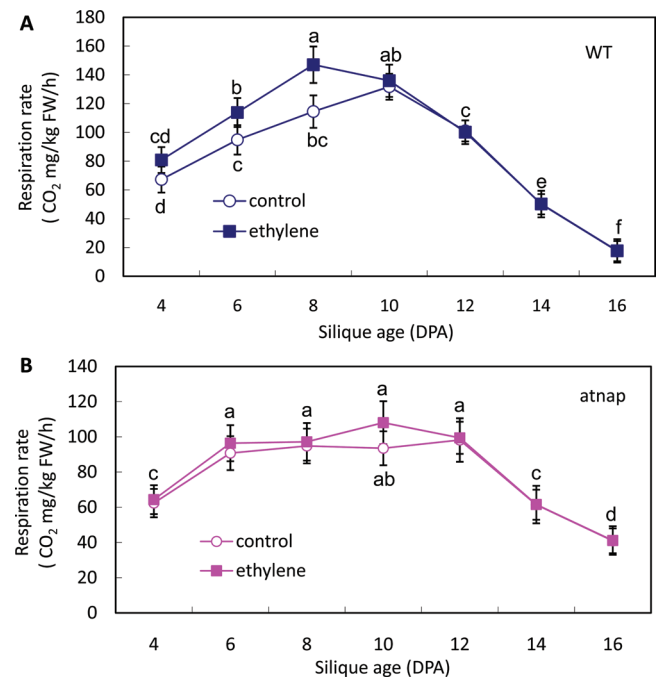

**Fig. 4.** Effect of exogenous ethylene on respiration rate of WT and the *atnap* siliques. (A) Respiration rate of WT siliques after  $10 \mu\text{l l}^{-1}$  exogenous ethylene treatment. (B) Respiration rate of the *atnap* mutant siliques after  $10 \mu\text{l l}^{-1}$  exogenous ethylene treatment. Bars are means  $\pm$ SD ( $n=4$ ). Significant ( $P=0.05$ ) differences between means are indicated by different letters.

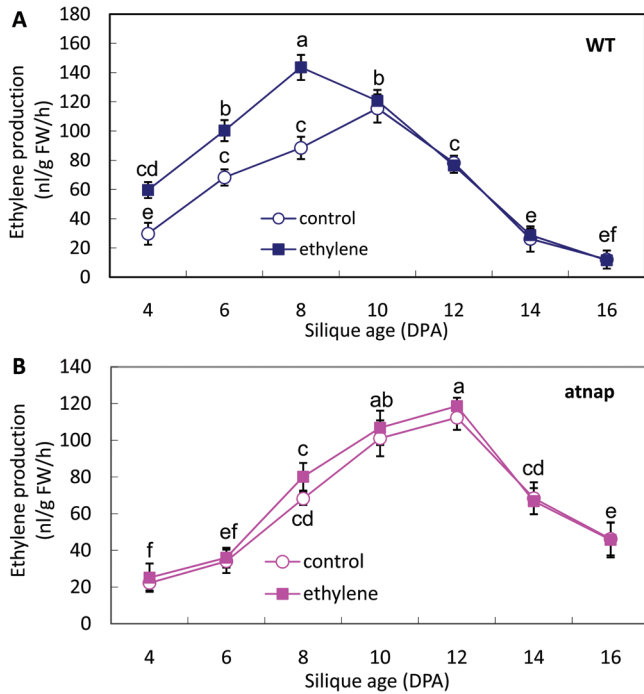

**Fig. 5.** Effect of exogenous ethylene on ethylene production in WT and the *atnap* siliques. (A) Ethylene production of WT siliques after treatment with  $10 \mu\text{l l}^{-1}$  ethylene. (B) Ethylene production of the *atnap* mutant siliques after treatment with  $10 \mu\text{l l}^{-1}$  ethylene. Bars are means  $\pm$ SD ( $n=4$ ). Significant ( $P=0.05$ ) differences between means are indicated by different letters.

#### Effects of exogenous ABA, SA, 6-BA and NAA on the ethylene production and respiration in WT and the *atnap* mutant siliques

Ethylene production and respiration rates of the WT and *atnap* mutant siliques in response to the plant hormones ABA, 6-BA, NAA, and SA were also measured. Ethylene production was lower in the mutant siliques than the WT in the control and after all hormone treatments (Fig. 6A), but different responses to the treatments were detected. Production of WT siliques decreased after the treatments with 6-BA, SA, and NAA, respectively, but was increased by ABA treatment ( $P < 0.05$ ). In the *atnap* mutant siliques, ethylene production was similar in the control, NAA, and ABA treatments, with no increased production resulting from ABA treatment. 6-BA caused the greatest reduction of ethylene production.

Respiration rates were highest in the ABA-treated WT siliques, but, in general, little difference in rates were detected between the WT and the *atnap* mutant siliques in response to the plant hormones (Fig. 5B). Overall rates were lower in NAA, 6-BA, and SA treatments.

#### AtNAP transcript levels increase with progression of fruit senescence

Because the loss-of-function of *AtNAP* had a profound impact on *Arabidopsis* silique senescence, we investigated if *AtNAP* is up-regulated during fruit senescence. qPCR showed that the

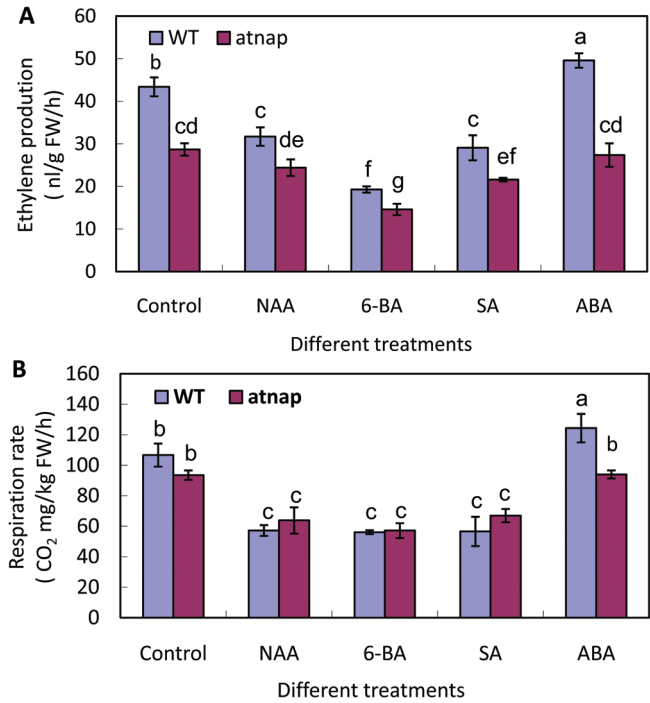

**Fig. 6.** Effect of various exogenous plant hormones on ethylene production and respiration rate in WT and the *atnap* mutant siliques. (A) Ethylene production of WT and *atnap* mutant siliques after exogenous plant hormone treatments. (B) Respiration rate of WT and *atnap* mutant siliques after exogenous plant hormone treatments. Significant ( $P=0.05$ ) differences between means are indicated by different letters.

transcript levels of *AtNAP* increased with the progression of fruit senescence in the WT (Fig. 7), but the *AtNAP* transcripts were not detectable in the *atnap* mutant siliques (Fig. 7).

#### Altered expression levels of genes involved in ethylene biosynthesis, perception, and signalling in the *atnap* fruits

The expression patterns of selected genes related to ethylene biosynthesis (*ACS*), perception (*ETR1*), and signal transduction (*CTR1*, *EIN2*, *ERF1/2*, and *EIN3*) were analysed.

*AtACS2* encodes an ACC synthase that catalyzes the formation of ACC in the ethylene biosynthesis pathway. The expression levels of *AtACS2* increased then decreased in both the WT and *atnap* mutant siliques but the expression levels in the *atnap* mutant siliques were lower than those in developmentally matched WT siliques (Fig. 8).

*AtETR1* encodes an ethylene receptor (Chang *et al.*, 1993; Bleeker *et al.*, 1998). The changes in *AtETR1* transcript levels in developing and senescing WT siliques were very similar to the pattern of *AtACS2* in WT siliques. However, the pattern of *AtETR1* expression in the *atnap* background was different from that of *AtACS2*; the expression levels of *AtETR1* in 6- and 8-DPA mutant siliques were higher than in age-matched WT siliques (Fig. 8).

*AtCTR1* is a gene encoding an ethylene signalling component that is immediately downstream of *AtETR1* (Kieber *et al.*, 1993).

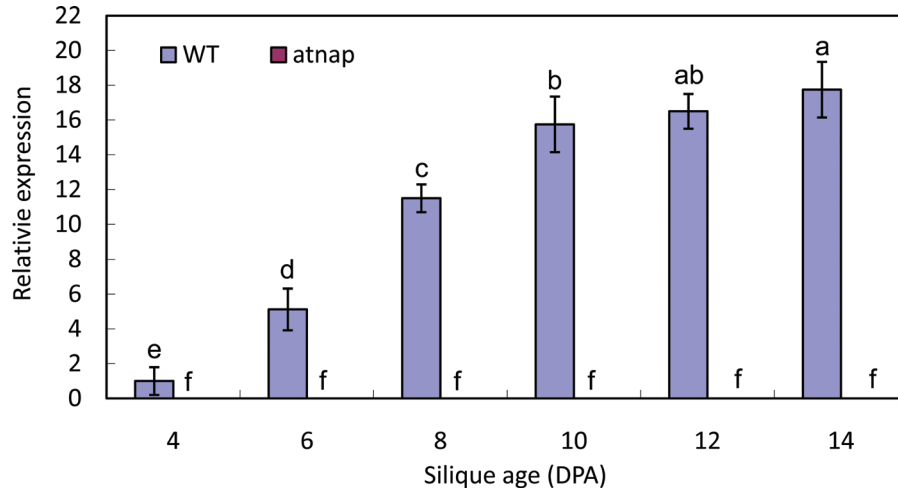

**Fig. 7.** *AtNAP* gene expression in WT and the *atnap* siliques during development and senescence. qPCR analyses were performed. Relative expression levels were calculated and normalized with respect to *Actin 2* (*ACT2*) transcripts. Four independently isolated RNA samples at each time point were used. Bars are means  $\pm$ SD ( $n=4$ ). Note the expression levels in the *atnap* knockout siliques were almost non-detectable. Significant ( $P=0.05$ ) differences between means are indicated by different letters.

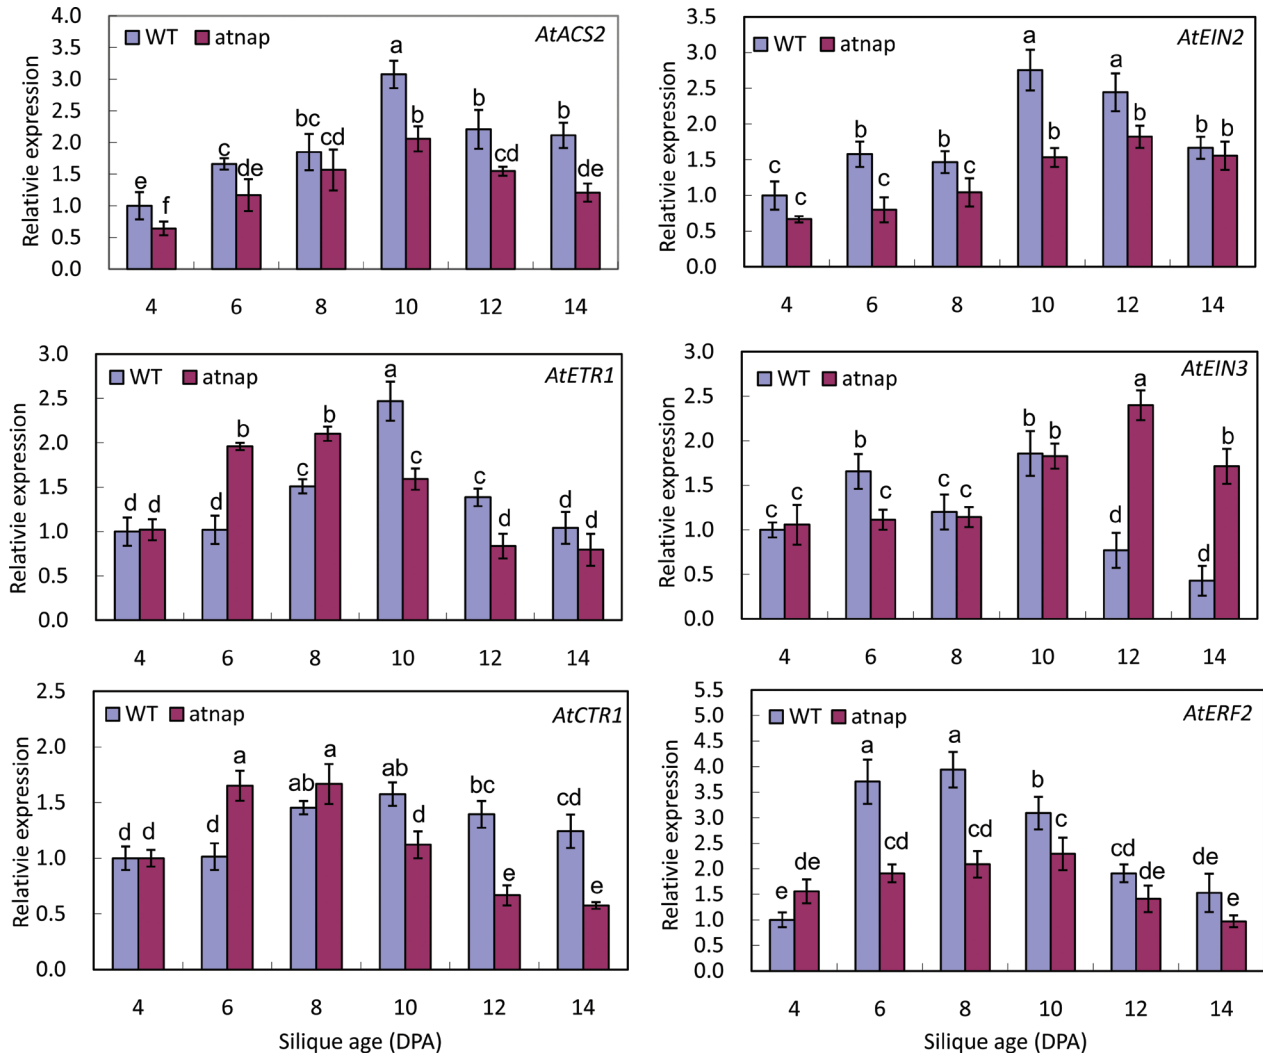

**Fig. 8.** Expression levels of genes involved in ethylene biosynthesis, perception, and signal transduction in siliques of WT and the *atnap* mutant during development and senescence. qPCR analyses were performed. Relative expression levels were calculated and normalized with respect to *Actin 2* (*ACT2*) transcripts. Four independently isolated RNA samples at each time point were used. Bars are means  $\pm$ SD ( $n=4$ ). Significant ( $P=0.05$ ) differences between means are indicated by different letters.

The expression patterns in both the WT and *atnap* mutant fruits are very similar to those of *AtETRI* (Fig. 8).

*AtEIN2* (Alonso *et al.*, 1999) encodes an ethylene signal transducer downstream of *AtCTR1*. The expression of *AtEIN2* in the *atnap* siliques was down-regulated compared with that in age-matched WT siliques (Fig. 8).

*AtERF1* encodes an *Arabidopsis* EIN3-binding F-box protein (Binder *et al.*, 2007). It functions downstream of *AtEIN2* and upstream of *AtEIN3*. As shown in Fig. 8, the expression pattern of *AtERF1* in WT siliques is different from the other genes tested; its transcript levels reached the peak at 8 DPA, approximately 2 d earlier than the other genes tested. The expression of this gene in the *atnap* mutant siliques was, however, less dramatically changed during development and senescence (Fig. 8).

*AtEIN3* is a nuclear protein gene (Chao *et al.*, 1997) that functions immediately after *AtERF1* in ethylene signalling (Binder *et al.*, 2007). The null mutation of this gene resulted in accelerated senescence, among others (Chao *et al.*, 1997). The *AtEIN3* expression was sharply down-regulated in the WT siliques that were 12 DPA or older but was highly up regulated in the age-matched *atnap* mutant siliques (Fig. 8).

## Discussion

*The Arabidopsis silique has characteristics of a climacteric fruit*

Much progress has been made in the molecular regulation of leaf senescence in *Arabidopsis* (Gan, 2003) and fruit ripening in tomato (Giovannoni, 2004, 2007). However, such fundamental questions as whether *Arabidopsis* fruit is climacteric and how its senescence is regulated are largely unknown. In this study, the patterns of ethylene production and respiration (Fig. 3), as well as silique responses to exogenous ethylene (Figs 4, 5) indicates that they have characteristics of climacteric fruits.

*AtNAP plays an important role in fruit senescence*

*AtNAP*, a plant-specific transcription factor gene, was shown to have a pivotal role in controlling leaf senescence, leaf senescence being delayed for up to 10 d in the *atnap* knockout plants (Guo and Gan, 2006). It is revealed here that *AtNAP* also plays a critical role in regulating silique senescence in *Arabidopsis*. Similar to its up-regulation during leaf senescence (Guo and Gan, 2006; Zhang and Gan, 2012), *AtNAP* transcript levels were elevated with the progression of silique senescence in *Arabidopsis* (Fig. 7), and silique senescence was delayed for 4–5 d when *AtNAP* was knocked out (Figs 1, 2). Interestingly, a NAC transcriptional factor in tomato (with a protein ID AAU43923) encoded by the tomato *nonripening* (*nor*) locus (Giovannoni, 2007) appears to be an orthologue of *AtNAP* (Guo and Gan, 2006); *nor* displays a significant delay in tomato fruit ripening (Tigchelaar *et al.*, 1973).

*AtNAP is required for ethylene stimulation of respiration during fruit senescence*

It is widely accepted that ethylene is a major factor that promotes senescence of the stigma and ovule (Carbonell-Bejerano *et al.*,

2011), fruits (Oeller *et al.*, 1991; Picton *et al.*, 1993; Wilkinson *et al.*, 1995; Watkins, 2002; Giovannoni, 2007) as well as leaves (Jing *et al.*, 2005). However, the link between ethylene and respiration is not well understood. Our research presented here showed that the ethylene surge and the respiratory surge in the *atnap* knockout mutant plants were de-coupled. While the onset of the ethylene climacteric was delayed for approximately 2 d when compared with that of WT siliques, and occurred during fruit senescence in the *atnap* mutant plants (Fig. 3A), the respiratory surge was suppressed in the *atnap* mutant siliques (Fig. 3B). Similarly, exogenous ethylene treatment promoted earlier occurrence of the surge in respiration in the WT siliques (Fig. 4A). By contrast, the same treatment did not alter the respiration pattern in the *atnap* mutant siliques (Fig. 4B). These data suggest that *AtNAP* is required for ethylene to stimulate the respiration in senescing siliques in *Arabidopsis*, but further analysis is required.

*Physiological and molecular bases of AtNAP-regulated silique senescence*

The reduced effect of endogenously produced and exogenously applied ethylene to induce corresponding respiratory surges in the *atnap* mutant siliques (Figs 3, 4) suggests that the sensitivity of siliques to ethylene may be reduced in the mutant plants. *AtNAP* as a transcription factor can bind to the promoter regions of its immediate target genes to regulate their expression at the transcriptional levels, and the expression of these target genes may subsequently alter the expression and function of other genes. Changes in expression of several genes that are involved in ethylene biosynthesis, perception, and signal transduction pathways were therefore investigated (Fig. 8). For simplicity, the six genes can be arranged in the following order: *AtACS2*→*AtETRI*→*AtCTR1*→*AtEIN2*→*AtERF1*→*AtEIN3*, with *AtACS2* in ethylene production and *AtEIN3* as the most downstream component of the ethylene signal transduction. As shown in Fig. 8, the first five genes were indeed suppressed to various extents in the *atnap* knockout mutant fruits whereas the expression of *AtEIN3* was significantly enhanced after 12 DPA. Ethylene production by the *atnap* fruits reached maximum levels at 12 DPA (Fig. 5). The expression of EIN3-like genes in tomato was shown to be associated with fruit ripening (Tiemann *et al.*, 2001; Yokotani *et al.*, 2003). It is still unclear how the changes in expression of *AtEIN3* and other genes affect silique senescence in the *atnap* mutant plants.

Recently, *AtNAP* was shown to regulate the expression of *SAG113* directly, a PP2C family protein phosphatase gene (Zhang and Gan, 2012; Zhang *et al.*, 2012). The *AtNAP*-PP2C regulatory node mediates ABA to inhibit stomata from closing so that leaves lose water dramatically; the loss of water triggers and promotes leaf senescence (Zhang and Gan, 2012; Zhang *et al.*, 2012). However, it is unknown whether this mechanism may apply to fruit senescence although stomata do develop with the growth and development of siliques in *Arabidopsis* (Carbonell-Bejerano *et al.*, 2010). The ABA levels also increase during fruit ripening in fruit such as tomato and avocado (Adato *et al.*, 1976; Zhang *et al.*, 2009) although the ABA levels during silique development and senescence in *Arabidopsis* are yet



to be determined. One plausible explanation is that *AtNAP*, via the ABA-*AtNAP*-SAG113 PP2C regulatory chain, will prevent stomata from closing so that enough oxygen can diffuse into the silique tissue for ethylene-stimulated fast respiration in the WT siliques. In the *atnap* knockout siliques, however, the closure of the stomata would be promoted, this would result in less oxygen for respiration as observed in Fig. 3B. This model is supported by the fact that the ABA treatment promoted respiration in the WT siliques (presumably by inhibiting stomata from closing such that more oxygen could get into the silique tissues for respiration) but had no effect on the respiration of the *atnap* mutant siliques (Fig. 6B). This model is also supported by observations in tomato that ABA precedes ethylene and may regulate it through the NAC gene (Giovanni Giuliano and James Giovannoni, personal communication). Further research is needed to test this stomatal model.

## Supplementary data

Supplementary data can be found at *JXB* online.

Supplementary Table S1. Primers used for qPCR.

## Acknowledgements

We are very grateful to Dr James Giovannoni (Cornell University) for critical reading of the manuscript and for sharing unpublished results, Jacqueline Nock (Cornell University) for help in measuring ethylene production and respiration rate, and Dr Yongfeng Guo for the *atnap* seeds. We also thank Dr Xiuying Xia, Kai Hou, Dr Jiankang Cao, and other members in the Watkins' and Gan's laboratories for useful discussions. Xiaohong Kou was a recipient of a scholarship from the China Scholarship Council. This work was supported by a US Department of Energy grant no. DE-FG02-02ER15341 (to S-SG), US National Institute of Food and Agriculture regional project NE1036 (to CBW), and the National Nature Science Foundation of China no. 31171769 (to X-HK).

## References

- Adato I, Gazit S, Blumenfeld A.** 1976. Relationship between changes in abscisic acid and ethylene production during ripening of avocado fruits. *Australian Journal of Plant Physiology* **3**, 555–558.
- Alexander L, Grierson D.** 2002. Ethylene biosynthesis and action in tomato: a model for climacteric fruit ripening. *Journal of Experimental Botany* **53**, 2039–2055.
- Alonso JM, Hirayama T, Roman G, Nourizadeh S, Ecker JR.** 1999. EIN2, a bifunctional transducer of ethylene and stress responses in *Arabidopsis*. *Science* **284**, 2148–2152.
- Binder BM, Walker JM, Gagne JM, Emborg TJ, Hemmann G, Bleecker AB, Vierstra RD.** 2007. The *Arabidopsis* EIN3 binding F-box proteins EBF1 and EBF2 have distinct but overlapping roles in ethylene signaling. *The Plant Cell* **19**, 509–523.
- Bleecker AB, Esch JJ, Hall AE, Rodríguez FI, Binder BM.** 1998. The ethylene-receptor family from *Arabidopsis*: structure and function. *Philosophical Transactions of the Royal Society of London. Series B: Biological Sciences*. **353**, 1405–1412.
- Carbonell-Bejerano P, Urbez C, Carbonell J, Granell A, Perez-Amador MA.** 2010. A fertilization-independent developmental program triggers partial fruit development and senescence processes in pistils of *Arabidopsis*. *Plant Physiology* **154**, 163–172.
- Carbonell-Bejerano P, Urbez C, Granell A, Carbonell J, Perez-Amador MA.** 2011. Ethylene is involved in pistil fate by modulating the onset of ovule senescence and the GA-mediated fruit set in *Arabidopsis*. *BMC Plant Biology* **11**, 84.
- Chang C, Kwok SF, Bleecker AB, Meyerowitz EM.** 1993. *Arabidopsis* ethylene-response gene ETR1: similarity of product to two-component regulators. *Science* **262**, 539–544.
- Chao Q, Rothenberg M, Solano R, Roman G, Terzaghi W, Ecker JR.** 1997. Activation of the ethylene gas response pathway in *Arabidopsis* by the nuclear protein ETHYLENE-INSENSITIVE3 and related proteins. *Cell* **89**, 1133–1144.
- Fang S-C, Fernandez DE.** 2002. Effect of regulated overexpression of the MADS domain factor *AGL15* on flower senescence and fruit maturation. *Plant Physiology* **130**, 78–89.
- Gan S-S.** 1995. Molecular characterization and genetic manipulation of plant senescence. PhD dissertation, University of Wisconsin-Madison, Madison, WI, USA.
- Gan S-S.** 2003. Mitotic and postmitotic senescence in plants. *Science of Aging Knowledge Environment* **2003**, Re7.
- Giovannoni JJ.** 2004. Genetic regulation of fruit development and ripening. *The Plant Cell* **16**, S170–S180.
- Giovannoni JJ.** 2007. Fruit ripening and its manipulation. In: Gan S-S, ed, *Senescence processes in plants*. Oxford, UK: Blackwell Publishing Ltd, 278–303.
- Guo Y, Gan S-S.** 2006. *AtNAP*, a NAC family transcription factor, has an important role in leaf senescence. *The Plant Journal* **46**, 601–612.
- He Y, Gan S-S.** 2002. A gene encoding an acyl hydrolase is involved in leaf senescence in *Arabidopsis*. *The Plant Cell* **14**, 805–815.
- Jing H-C, Schippers JHM, Hille J, Dijkwel, PP.** 2005. Ethylene-induced leaf senescence depends on age-related changes and *OLD* genes in *Arabidopsis*. *Journal of Experimental Botany* **56**, 2915–2923.
- Kieber JJ, Rothenberg M, Roman G, Feldmann KA, Ecker JR.** 1993. CTR1, a negative regulator of the ethylene response pathway in *Arabidopsis*, encodes a member of the Raf family of protein kinases. *Cell* **72**, 427–441.
- Klee HJ, Giovannoni JJ.** 2011. Genetics and control of tomato fruit ripening and quality attributes. *Annual Review of Genetics* **45**, 41–59.
- Oeller PW, Lu MW, Taylor LP, Pike DA, Theologis A.** 1991. Reversible inhibition of tomato fruit senescence by antisense RNA. *Science* **254**, 437–439.
- Onate-Sanchez L, Vicente-Carbajosa J.** 2008. DNA-free RNA isolation protocols for *Arabidopsis thaliana*, including seeds and siliques. *BioMed Central Research Notes* **1**, 93 (doi:10.1186/1756-0500-1181-1193).
- Picton S, Barton SL, Bouzayen M, Hamilton AJ, Grierson D.** 1993. Altered fruit ripening and leaf senescence in tomatoes



expressing an antisense ethylene-forming enzyme transgene. *The Plant Journal* **3**, 469–481.

**Tieman DM, Ciardi JA, Taylor MG, Klee HJ.** 2001. Members of the tomato LeEIL (EIN3-like) gene family are functionally redundant and regulate ethylene responses throughout plant development. *The Plant Journal* **26**, 47–58.

**Tigchelaar EC, Tomes M, Kerr EA, Barman RJ.** 1973. A new fruit ripening mutant, non-ripening (nor). *Report of the Tomato Genetic Cooperative* **23**, 33–34.

**Vrebalov J, Ruezinsky D, Padmanabhan V, White R, Medrano D, Drake R, Schuch W, Giovannoni J.** 2002. A MADS-box gene necessary for fruit ripening at the tomato ripening-inhibitor (rin) locus. *Science* **296**, 343–346.

**Wagstaff C, Yang TJ, Stead AD, Buchanan-Wollaston V, Roberts JA.** 2009. A molecular and structural characterization of senescing *Arabidopsis* siliques and comparison of transcriptional profiles with senescing petals and leaves. *The Plant Journal* **57**, 690–705.

**Watkins CB.** 2002. Ethylene synthesis, mode of action, consequences and control. In: Knee M, ed, *Fruit quality and*

*its biological basis*. Sheffield, UK: Sheffield Academic Press, 180–224.

**Wilkinson JQ, Lanahan MB, Yen H-C, Giovannoni JJ, Klee HJ.** 1995. An ethylene-inducible component of signal transduction encoded by *never-ripe*. *Science* **270**, 1807–1809.

**Yokotani N, Tamura S, Nakano R, Inaba A, Kubo Y.** 2003. Characterization of a novel tomato EIN3-like gene (LeEIL4). *Journal of Experimental Botany* **54**, 2775–2776.

**Zhang K, Gan S-S.** 2012. An abscisic acid-AtNAP transcription factor-SAG113 protein phosphatase 2C regulatory chain for controlling dehydration in senescing *Arabidopsis* leaves. *Plant Physiology* **158**: 961–969.

**Zhang K, Xia X, Zhang Y, Gan S-S.** 2012. An ABA-regulated and Golgi-localized protein phosphatase controls water loss during leaf senescence in *Arabidopsis*. *The Plant Journal* **69**, 667–678.

**Zhang M, Yuan B, Leng P.** 2009. The role of ABA in triggering ethylene biosynthesis and ripening of tomato fruit. *Journal of Experimental Botany* **60**, 1579–1588.
